# Supplementary material for: Silica Encapsulation of Hydrophobic Optical NP-Embedded Silica Particles with Trimethoxy(2-Phenylethyl)silane
Source: MDPI journal article supplement (doi:10.3390/nano13142145), 2023-07-24
Supplement: s1 [file s1]

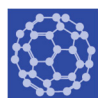

Supporting Information

# Silica Encapsulation of Hydrophobic Optical NP-Embedded Silica Particles with Trimethoxy(2-Phenylethyl)silane

Eunil Hahm <sup>1</sup>, Ahla Jo <sup>1</sup>, Eun Ji Kang <sup>1</sup>, Kwanghee Yoo <sup>1</sup>, Min-Sup Shin <sup>1</sup>, Jaehyun An <sup>1</sup>, Xuan-Hung Pham <sup>1</sup>, Hyung-Mo Kim <sup>1</sup>, Homan Kang <sup>2</sup>, Jaehi Kim <sup>1,\*</sup>, and Bong-Hyun Jun <sup>1,\*</sup>

<sup>1</sup> Department of Bioscience and Biotechnology, Konkuk University, Seoul 05029, Republic of Korea; greenice@konkuk.ac.kr (E.H.); iamara0421@konkuk.ac.kr (A.J.); ejkang@konkuk.ac.kr (E.J.K.); heu1997@konkuk.ac.kr (K.Y.); dnjzj159159@konkuk.ac.kr (M.-S.S.); wogus4067@naver.com (J.A.); phamricky@gmail.com (X.-H.P.); hmkim0109@konkuk.ac.kr (H.-M.K.)

<sup>2</sup> Gordon Center for Medical Imaging, Department of Radiology, Massachusetts General Hospital, Harvard Medical School, Boston, MA 02114, USA; hkang7@mgh.harvard.edu

\* Correspondence: susia45@gmail.com (J.K.); bjun@konkuk.ac.kr (B.-H.J.)

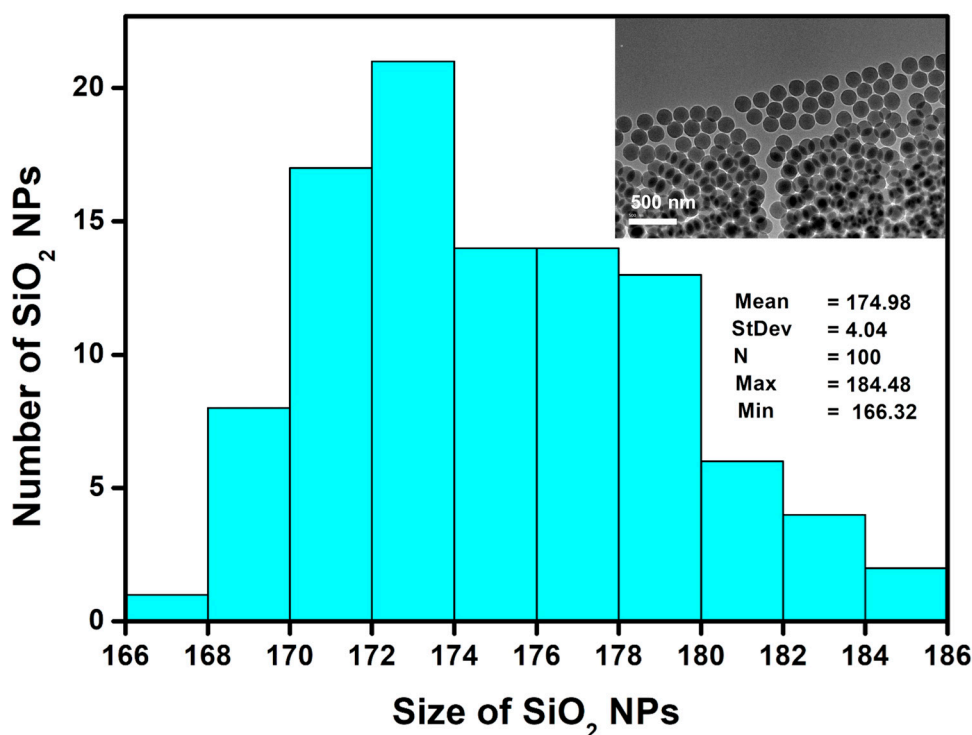

Figure S1. Histogram of particle size distribution of SiO<sub>2</sub> NPs (inset. TEM image of SiO<sub>2</sub> NPs).

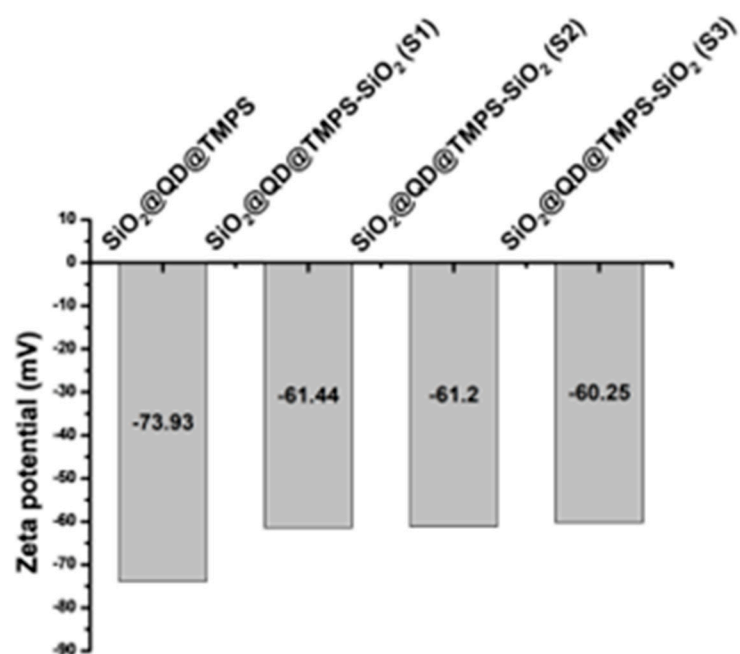

Figure S2. Zeta potential of SiO<sub>2</sub>@QD@TMPs-SiO<sub>2</sub> with different amount of TEOS.

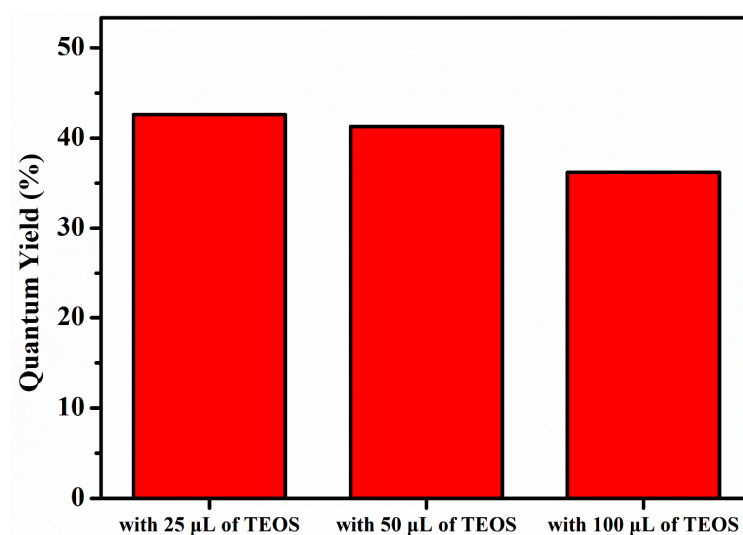

Figure S3. Quantum yield of fabricated SiO<sub>2</sub>@QD@TMPs-SiO<sub>2</sub> with different amount of TEOS.
